# Supplementary material for: Research on the Flexibility Margin of an Electric–Hydrogen Coupling Energy Block Based on Model Predictive Control
Source: Frontiers journal article supplement (doi:10.3389/fenrg.2022.879244), 2022-04-11
Supplement: Data_Sheet_2.docx [file Data_Sheet_2.docx]

Supplementary Material

## Supplementary Figures

**Figure 1** Electro-hydrogen coupling energy module

**Figure 2** Heterogeneous energy homogenization model

**Figure 3** Flexibility margin analysis

**Figure 4** Flowchart of the flexibility margin calculation method

**Figure 5** The value of load, photovoltaic plant output and wind farms output.

**Figure 6** The Simulation Analysis of scenario 2.

**Figure 7** The Simulation Analysis of scenario 3.

**Figure 8** Flexibility margin analysis of scenario 1.

**Figure 9** Flexibility margin analysis of scenario 2.

**Figure 10** Flexibility margin analysis of scenario 3.

**Figure 11** Renewable energy abandonment rate.
